# Supplementary material for: A genetic and linguistic analysis of the admixture histories of the islands of Cabo Verde
Source: eLife. 2023 Apr 25;12:e79827. doi: 10.7554/eLife.79827 (PMC10322156; doi:10.7554/eLife.79827)
Supplement: Figure 1—source data 1. [file elife-79827-fig1-data1.xlsx]

## Sheet: Figure1-resource_table_1
Figure 1-source data 1:
Population table corresponding to the map in Figure 1 and sample inclusion in all analysis.
References are numbered according to the reference-list numerotation in the main text.
(7). Patin E, Lopez M, Grollemund R, Verdu P, Harmant C, Quach H, et al. Dispersals and genetic adaptation of Bantu-speaking populations in Africa and North America. Science [Internet]. 2017 May 5 [cited 2021 Jun 4];356(6337):543–6. Available from: https://www.sciencemag.org/lookup/doi/10.1126/science.aal1988
(23). Verdu P, Jewett EM, Pemberton TJ, Rosenberg NA, Baptista M. Parallel Trajectories of Genetic and Linguistic Admixture in a Genetically Admixed Creole Population. Current Biology [Internet]. 2017 Aug [cited 2022 Feb 2];27(16):2529-2535.e3. Available from: https://linkinghub.elsevier.com/retrieve/pii/S096098221730859X
(93). The 1000 Genomes Project Consortium. A global reference for human genetic variation. Nature. 2015 Oct 1;526(7571):68–74.
(94). Gurdasani D, Carstensen T, Tekola-Ayele F, Pagani L, Tachmazidou I, Hatzikotoulas K, et al. The African Genome Variation Project shapes medical genetics in Africa. Nature [Internet]. 2015 Jan 15 [cited 2021 Jun 4];517(7534):327–32. Available from: http://www.nature.com/articles/nature13997
(95). Malaria Genomic Epidemiology Network, Band G, Le QS, Clarke GM, Kivinen K, Hubbart C, et al. Insights into malaria susceptibility using genome-wide data on 17,000 individuals from Africa, Asia and Oceania. Nat Commun [Internet]. 2019 Dec 16 [cited 2023 Jan 20];10(1):5732. Available from: https://www.nature.com/articles/s41467-019-13480-z
(96). Perry GH, Foll M, Grenier JC, Patin E, Nédélec Y, Pacis A, et al. Adaptive, convergent origins of the pygmy phenotype in African rainforest hunter-gatherers. Proc Natl Acad Sci USA [Internet]. 2014 Sep 2 [cited 2023 Jan 20];111(35). Available from: https://pnas.org/doi/full/10.1073/pnas.1402875111
Region	Population Code	Population description	N	Latitude	Longitude	Data Reference	Fig.1; Appendix1-fig.1	Appendix2-fig.1	Appendix2-fig.2	Appendix2-fig.3	Appendix2-fig.4	Fig.2; Fig.2-fig.supp.1	Fig.3; Fig.3-fig.supp.1-2; Appendix3-fig.1	Fig.4; Fig.4-fig.supp.1-2; Appendix4-fig.1-2	Fig.5	Fig.7; Fig.7-fig.supp.1-3; Appendix1-fig.2-4
West Western Africa	Cabo Verde Kriolu speakers	Born on Santiago	59	15.12	-23.64	This Study & (23)	x	x	x	x	x	x	x	x	x	x
	Cabo Verde Kriolu speakers	Born on Fogo	26	15.12	-23.64	This Study	x	x	x	x	x	x	x	x	x	x
	Cabo Verde Kriolu speakers	Born on Santo Antão	30	15.12	-23.64	This Study	x	x	x	x	x	x	x	x	x	x
	Cabo Verde Kriolu speakers	Born on São Nicolau	25	15.12	-23.64	This Study	x	x	x	x	x	x	x	x	x	x
	Cabo Verde Kriolu speakers	Born on Maio	10	15.12	-23.64	This Study	x	x	x	x	x	x	x	x	x	x
	Cabo Verde Kriolu speakers	Born on Brava	12	15.12	-23.64	This Study	x	x	x	x	x	x	x	x	x	x
	Cabo Verde Kriolu speakers	Born on Bõa Vista	17	15.12	-23.64	This Study	x	x	x	x	x	x	x	x	x	x
	Cabo Verde Kriolu speakers	Born on São Vicente	37	15.12	-23.64	This Study	x	x	x	x	x	x	x	x	x	x
	Cabo Verde Kriolu speakers	Born on Sal	9	15.12	-23.64	This Study	x	x	x	x	x	x	x	x	x	x
	Cabo Verde Kriolu speakers	Foreign born (Portugal, Mozambic, Angola, France, USA)	8	15.12	-23.64	This Study	x	x	x	x	x	x	-	-	-	-
	Fula	Gambian in Western Division, The Gambia - Fula	74	13.45	-16.58	(93,94,95)	x	x	x	x	-	-	-	-	-	-
	GWD	Gambian in Western Division, The Gambia - Mandinka	113	13.45	-16.58	(93,94,95)	x	x	x	x	x	x	Resample 50	Resample 50	-	-
	Jola	Gambian in Western Division, The Gambia - Jola	79	13.45	-16.58	(93,94,95)	x	x	x	x	x	x	Resample 50	Resample 50	-	-
	Mandinka	Gambia	87	13.47	-16.57	(94)	x	x	x	x	x	x	Resample 50	Resample 50	-	Resample 60
	Wolof	Gambian in Western Division, The Gambia - Wolof	78	13.45	-16.58	(93,94,95)	x	x	x	x	x	x	Resample 50	Resample 50	-	-
Central Western Africa	Ahizi	Ivory Coast	18	5.25	-4.61	(7)	x	x	x	x	x	x	-	-	-	-
	MSL	Mende in Sierra Leone	85	8.48	-13.23	(93)	x	x	x	x	x	x	Resample 50	Resample 50	-	-
	Yacouba	Ivory Coast	17	7.27	-8.17	(7,96)	x	x	x	x	x	x	-	-	-	-
East Western Africa	Bariba	Benin	20	9.35	2.62	(7)	x	x	x	x	x	x	-	-	-	-
	ESN	Esan in Nigeria	98	9.07	7.48	(93)	x	x	x	x	x	x	Resample 50	Resample 50	-	-
	Fon	Benin	12	6.35	2.41	(7)	x	x	x	x	x	x	-	-	-	-
	Ga-Adangbe	Ghana	100	8.00	-2.00	(94)	x	x	x	x	x	x	Resample 50	Resample 50	-	-
	Igbo	Nigeria	99	6.00	7.00	(94)	x	x	x	x	x	x	Resample 50	Resample 50	-	-
	Yoruba	Benin	20	7.36	2.60	(7)	x	x	x	x	x	x	-	-	-	-
	YRI	Yoruba in Ibadan, Nigeria	108	7.40	3.92	(93)	x	x	x	x	x	x	Resample 50	Resample 50	-	-
West Central Africa	Akele	Gabon	37	-0.70	10.22	(7)	x	x	x	x	-	-	-	-	-	-
	Ba.Bongo East	Gabon	27	-2.27	13.58	(7)	x	x	x	-	-	-	-	-	-	-
	Badwee	Cameroon	38	3.56	13.12	(7)	x	x	x	x	-	-	-	-	-	-
	Baka	Cameroon	97	3.08	14.07	(7)	x	x	x	-	-	-	-	-	-	-
	Bakota	Gabon	46	0.57	12.87	(7)	x	x	x	x	-	-	-	-	-	-
	Bakoya	Gabon	20	1.00	14.00	(7)	x	x	x	-	-	-	-	-	-	-
	Bapunu	Gabon	47	-1.87	11.02	(7)	x	x	x	x	-	-	-	-	-	-
	Bateke	Gabon	41	-0.82	12.70	(7)	x	x	x	x	-	-	-	-	-	-
	Bekwil	Gabon	5	1.18	13.22	(7)	x	x	x	x	-	-	-	-	-	-
	Benga	Gabon	38	0.58	9.33	(7)	x	x	x	x	-	-	-	-	-	-
	Bezan	Cameroon	20	5.45	11.36	(7)	x	x	x	-	-	-	-	-	-	-
	Biaka	Aka from CAR	15	4.00	17.00	(7)	x	x	x	-	-	-	-	-	-	-
	Duma	Gabon	39	-0.82	12.70	(7)	x	x	x	x	-	-	-	-	-	-
	Eshira	Gabon	40	-1.22	10.60	(7)	x	x	x	x	-	-	-	-	-	-
	Eviya	Gabon	23	-1.21	10.60	(7)	x	x	x	x	-	-	-	-	-	-
	Fang	Gabon	65	2.08	11.48	(7)	x	x	x	x	-	-	Resample 50	Resample 50	-	-
	Galoa	Gabon	46	-0.70	10.22	(7)	x	x	x	x	-	-	-	-	-	-
	Makina	Gabon	39	-0.10	11.93	(7)	x	x	x	x	-	-	-	-	-	-
	Ndumu	Gabon	37	-1.63	13.58	(7)	x	x	x	x	-	-	-	-	-	-
	Nzebi	Gabon	61	-1.57	13.20	(7)	x	x	x	x	-	-	Resample 50	Resample 50	-	-
	Obamba	Gabon	45	-0.68	13.78	(7)	x	x	x	x	-	-	-	-	-	-
	Okande	Gabon	7	-0.05	11.62	(7)	x	x	x	x	-	-	-	-	-	-
	Orungu	Gabon	19	-0.72	8.78	(7)	x	x	x	x	-	-	-	-	-	-
	Shake	Gabon	47	-0.82	12.70	(7)	x	x	x	x	-	-	-	-	-	-
	Tsogo	Gabon	60	-1.03	10.67	(7)	x	x	x	x	-	-	Resample 50	Resample 50	-	-
	Yaounde	Cameroon	39	3.84	11.50	(94)	x	x	x	x	-	-	-	-	-	-
Sout-West Central Africa	Kimbundu	Angola	17	-8.83	13.22	(7)	x	x	x	x	-	-	x	x	-	-
	Kongo	Angola	10	-8.83	13.22	(7)	x	x	x	x	-	-	x	x	-	-
	Ovimbundu	Angola	12	-8.83	13.22	(7)	x	x	x	x	-	-	x	x	-	-
	Umbundo	Angola	5	-8.83	13.22	(7)	x	x	x	x	-	-	x	x	-	-
South Africa	Sotho	South Africa	86	-29.13	26.26	(94)	x	x	x	x	-	-	Resample 50	Resample 50	-	-
	Zulu	South Africa	100	-29.00	24.00	(94)	x	x	x	x	-	-	Resample 50	Resample 50	-	-
East Africa	Baganda	Uganda	99	1.00	32.00	(94)	x	x	x	-	-	-	-	-	-	-
	Banyarwanda	Uganda	96	1.00	32.00	(94)	x	x	x	-	-	-	-	-	-	-
	Barundi	Uganda	93	1.00	32.00	(94)	x	x	x	-	-	-	-	-	-	-
	Ethiopia	Ethiopia	107	8.00	38.00	(94)	x	x	x	-	-	-	-	-	-	-
	Kalenjin	Kenya	100	1.00	38.00	(94)	x	x	x	-	-	-	-	-	-	-
	Kikuyu	Kenya	99	-0.40	36.90	(94)	x	x	x	-	-	-	-	-	-	-
	LWK	Luhya in Webuye, Kenya	97	-1.27	36.61	(93)	x	x	x	-	-	-	-	-	-	-
	Mbuti	DRC	13	1.00	29.00	(7)	x	x	x	-	-	-	-	-	-	-
	Twa	Uganda	2	-0.98	29.62	(7,96)	x	x	x	-	-	-	-	-	-	-
Europe	FIN	Finnish in Finland	99	60.17	24.93	(93)	x	x	x	x	x	x	Resample 50	Resample 50	-	-
	GBR	British in England and Scotland	90	52.49	-1.89	(93)	x	x	x	x	x	x	Resample 50	Resample 50	-	-
	IBS	Iberian populations in Spain	107	40.38	-3.72	(93)	x	x	x	x	x	x	Resample 50	Resample 50	-	Resample 60
	TSI	Toscani in Italy	107	42.10	12.00	(93)	x	x	x	x	x	x	Resample 50	Resample 50	-	-
South Asia	BEB	Bengali in Bangladesh	86	23.70	90.35	(93)	x	x	-	-	-	-	-	-	-	-
	GIH	Gujarati Indians in Houston, TX	101	22.62	70.69	(93)	x	x	-	-	-	-	-	-	-	-
	ITU	Indian Telugu in the UK	101	17.18	79.79	(93)	x	x	-	-	-	-	-	-	-	-
	PJL	Punjabi in Lahore, Pakistan	94	31.55	74.36	(93)	x	x	-	-	-	-	-	-	-	-
	STU	Sri Lankan Tamil in the UK	99	8.38	80.50	(93)	x	x	-	-	-	-	-	-	-	-
East Asia	CDX	Chinese Dai in Xishuangbanna, China	92	22.00	100.78	(93)	x	x	-	-	-	-	-	-	-	-
	CHB	Han Chinese in Beijing, China	103	39.92	116.38	(93)	x	x	-	-	-	-	Resample 50	Resample 50	-	-
	CHS	Han Chinese South	104	23.13	113.27	(93)	x	x	-	-	-	-	-	-	-	-
	JPT	Japanese in Tokyo, Japan	104	35.68	139.68	(93)	x	x	-	-	-	-	-	-	-	-
	KHV	Kinh in Ho Chi Minh City, Vietnam	99	10.78	106.68	(93)	x	x	-	-	-	-	-	-	-	-
USA	ASW	African Ancestry in Southwest US	55	35.48	-97.53	(93)	x	x	x	x	x	x	Resample 50	Resample 50	-	-
	CEU	US Utah residents (CEPH) with Northern and Western European ancestry	99	40.77	-111.89	(93)	x	x	x	x	x	x	Resample 50	Resample 50	-	-
	MXL	Mexican Ancestry in Los Angeles, California	64	34.05	-118.24	(93)	x	x	-	-	-	-	-	-	-	-
Carribbean	ACB	African Caribbean in Barbados	95	13.10	-59.62	(93)	x	x	x	x	x	x	Resample 50	Resample 50	-	-
	PUR	Puerto Rican in Puerto Rico	104	18.40	-66.10	(93)	x	x	x	x	x	x	-	-	-	-
South America	CLM	Colombian in Medellin, Colombia	94	4.58	-74.07	(93)	x	x	-	-	-	-	-	-	-	-
	PEL	Peruvian in Lima, Peru	85	-12.04	-77.03	(93)	x	x	-	-	-	-	-	-	-	-
