# Supplementary material for: A genetic and linguistic analysis of the admixture histories of the islands of Cabo Verde
Source: eLife. 2023 Apr 25;12:e79827. doi: 10.7554/eLife.79827 (PMC10322156; doi:10.7554/eLife.79827)
Supplement: Figure 4—source data 1. [file elife-79827-fig4-data1.xlsx]

## Sheet: Figure4-resource_table_1
Figure 4-source data 1:
Mean proportion of total length of ROH that are classified as long (cM≥1) for each Cabo Verdean island of birth.
Cabo Verdean birth-island	Mean proportion of total length of long-ROH
Brava	0.07973
Fogo	0.13586
Santiago	0.06459
Maio	0.22948
Boa Vista	0.28049
Sal	0.24777
São Nicolau	0.25810
São Vicente	0.18486
Santo Antão	0.25979
