# Supplementary material for: A genetic and linguistic analysis of the admixture histories of the islands of Cabo Verde
Source: eLife. 2023 Apr 25;12:e79827. doi: 10.7554/eLife.79827 (PMC10322156; doi:10.7554/eLife.79827)
Supplement: Figure 4—source data 2. [file elife-79827-fig4-data2.xlsx]

## Sheet: Feuil1
Figure 4-source data 2:
Permutation tests’ p-values for over/under representation of ancestry in long ROH (cM≥1) for each Cabo Verdean island of birth.
As mentioned in the main Material and Methods 4, for each individual in each island, we randomly permute the location of all long ROH (ensuring that no permuted ROH overlap), re-compute the local AFR ancestry proportion falling within these permuted ROH, and then subtract the global ancestry proportion. We then take the mean of this difference across all individuals for each island and repeat the…
Cabo Verdean birth-island	AFR over-representation (10,000 permutation p-value)	AFR under-representation (10,000 permutation p-value)
Brava	0.8529	0.1471
Fogo	1	0
Santiago	0.9339	0.0661
Maio	0.9390	0.0610
Boa Vista	0.1562	0.8438
Sal	0.1899	0.8101
São Nicolau	0.1670	0.8330
São Vicente	0	1
Santo Antão	0.0001	0.9999
