# Supplementary material for: A genetic and linguistic analysis of the admixture histories of the islands of Cabo Verde
Source: eLife. 2023 Apr 25;12:e79827. doi: 10.7554/eLife.79827 (PMC10322156; doi:10.7554/eLife.79827)
Supplement: Figure 4—source data 3. [file elife-79827-fig4-data3.xlsx]

## Sheet: Figure4-resource_table_3
Figure 4-source data 3:
Mean proportion of total length of long ROH (cM≥1) that have heterozygous ancestry (AFR and EUR), for each Cabo Verdean island of birth.
Cabo Verdean birth-island	Mean proportion of total length of long ROH with heterozygous ancestry
Brava	0.00393642
Fogo	0.01171550
Santiago	0.05129846
Maio	0.03436647
Boa Vista	0.01112053
Sal	0.02761951
São Nicolau	0.00143084
São Vicente	0.02112456
Santo Antão	0.02805926
