# Supplementary material for: A genetic and linguistic analysis of the admixture histories of the islands of Cabo Verde
Source: eLife. 2023 Apr 25;12:e79827. doi: 10.7554/eLife.79827 (PMC10322156; doi:10.7554/eLife.79827)
Supplement: Figure 7—source data 1. [file elife-79827-fig7-data1.xlsx]

## Sheet: Figure7-resource_table_1
Figure 7-source data 1:
Historical landmark chronology for the peopling history of Cabo Verde as provided by previous historical work, respectively for each island.
See detailed historical references in the table. References are numbered according to the reference-list numerotation in the main text.
(25). Carreira, A. 2000. Cabo Verde: Formação e Extinção de Uma Sociedade Escravocrata (1460-1878). 3rd ed. Estudos e Ensaios. Praia, Cabo Verde: IPC.
(26). Albuquerque, Luís de, and Maria Emília Madeira Santos, eds. 1991. História geral de Cabo Verde T1. Vol. 1. 3 vols. Lisboa : Praia [Cape Verde]: Centro de Estudos de História e Cartografia Antiga, Instituto de Investigação Científica Tropical ; Instituto Nacional da Cultura de Cabo Verde.
(27). Albuquerque, Luís de, and Maria Emília Madeira Santos, eds. 1995. História geral de Cabo Verde T2. 2. ed. Vol. 2. 3 vols. Lisboa: Centro de Estudos de História e Cartogr. Antiga.
(28). Albuquerque, Luís de, and Maria Emília Madeira Santos, eds. 2007. História concisa de Cabo Verde (Resumo da História geral de Cabo Verde T1-3). 1 vols. Lisboa: Inst. de Investigação Científica Tropical.
(78). Patterson, K. David. 1988. “Epidemics, Famines, and Population in the Cape Verde Islands, 1580-1900.” The International Journal of African Historical Studies 21 (2): 291. https://doi.org/10.2307/219938.
(79). Brooks, George E. 2006. “Cabo Verde: Gulag of the South Atlantic: Racism, Fishing Prohibitions, and Famines.” History in Africa 33: 101–35. https://doi.org/10.1353/hia.2006.0008
(91). Conrad, Robert. 1969. “The Contraband Slave Trade to Brazil, 1831-1845.” Hispanic American Historical Review 49 (4): 617–38. https://doi.org/10.1215/00182168-49.4.617
(119). The voyage of M. George Fenner to Guinea and to the Isles of Capo Verde, An. 1566. In Hakluyt, Richard. 2014. The Principal Navigations, Voyages, Traffiques and Discoveries of the English Nation. Cambridge: Cambridge University Press. https://doi.org/10.1017/CBO9781107286306
(120). Cabo Verde, Statistical Yearbook 2015, Instituto Nacional de Estatística, Praia, Cabo Verde. https://ine.cv/wp-content/uploads/2017/02/statistical-yearbook-cv-2015_en.pdf
Color Legend:
	First significant indication of permanent settlement
	Administrative information
	Church establishment
	Census information
Year	Cabo Verde		SANTIAGO		FOGO		SANTO ANTAO		SAO NICOLAU		BRAVA		MAIO		BOA VISTA		SAO VICENTE		SAL
	Unspecified island
1460-1466	Discovery of the archipelago	all	First settlers from Portugal	all	First settlers from Portugal	all
1472	Portuguese crown restricting slave-trade out of Cabo Verde. First trade and population movements regulation (All references)
1480-1493					Remote administration of the island from Santiago, São Filipe church foundation	(26). p143
1495					Royal donation changes island ownership and administration	(26). p53
1504							Royal donation changes island ownership and administration	(26). p56					Royal donation changes island ownership and administration	(26). p55
1505													Census= 225	(78). p294
1507							Extensive livestock farming without permanent peopling, from tax records	(28). p135	Extensive livestock farming without permanent peopling, from tax records	(28). p135			Extensive livestock farming without permanent peopling, from tax records	(28). p135	Extensive livestock farming without permanent peopling, from tax records	(28). p135	Extensive livestock farming without permanent peopling, from tax records	(28). p135
1509											Royal donation changes island ownership and administration	(26). p57							Royal donation changes island ownership and administration	(26). p57
1513	Census= 3500	(26). p147-148	382 slaves imported from "Guinea"	(26). p264
				(25). p135
1514			1354 slaves imported from "Guinea"	(26). p264
				(25). p135
1515			1404 slaves imported from "Guinea"	(26). p264
				(25). p135
1516			26 slaves imported from "Guinea"	(25). p135
1526			Commerce records indicate ~300 slaves sent to Portugal per year during 3 years	(26). p97
1529
1527							Military troops sent from Santiago against Spanish marauders	(28). p329	Military troops sent from Santiago against Spanish marauders	(28). p329							Military troops sent from Santiago against Spanish marauders	(28). p329
1528			1404 slaves imported from "Guinea"	(26). p267					Fishing watters and boat halt	(26). p225							Fishing watters and boat halt	(26). p225
1529													Permanent harbour and salt depot, possible small-size permanent settlement	(26). p223-224					Permanent harbour and salt depot, possible small-size permanent settlement	(26). p223-224
1532					All trade, administration, and population movements under control by Santiago, except direct trade with Portuguese crown	(26). p101-105
1540											Fogo fishing watters, no mention of permanent settlement	(26). p225
1546	Instances of donations/inheritance of both goods/money and land to the benefit of admixed offsprings	(26). p162-164
1557
1548									Request to Santiago for additional workforce, no trace of the outcome	(26). p228							Request to Santiago for additional workforce, no trace of the outcome	(26). p228
1566															Census= 30, prisonners kept on the island, extensive livestock farming and goat-skin production	(119). p275
1570							Reports of small-size permanent settlement, no census	(26). p146			Reports of illegal slave trade	(28). p329					Reports of small-size permanent settlement, no census	(26). p146
1572			Census= 8900, only town residents, no children, no marginalized people	(27). p279	Census= 1000, in São Filipe	(26). p146
				(26). p231
1573							Church foundation	(26). p146
1580	Census= 9940	(78). p297	Census= 8000	(78). p294	Census= 1200	(78). p294	Census= 400, Permanent harbor	(26). p213	Census= 140, Permanent harbor	(26). p213	Census= 100	(78). p294	Census= 50	(78). p294	Illegal slave trade of 50 individuals	(28). p329	Census= 0	(78). p294	Census= 0	(78). p294
								(78). p294		(78). p294						(78). p294
1580-1614	Admixed individuals own and/or manage commercial firms	(27). p515
1580-1582					Famine reports (thus implying prior settlement ?)	(26). p12-14					Famine reports (thus implying prior settlement ?)	(26). p12-14	Famine reports (thus implying prior settlement ?)	(26). p12-14
						(79). p106						(79). p106		(79). p106
1582-1731	Second migration wave into Santo Antão and São Nicolau and in the interior of Fogo and Santiago ((26). p230; (28). p302; (25). p387; (78). p293)
1582			Census= 2600 only town residents, no children, no marginalized people, 11700 slaves. Population movements from Ribeira Grande and Praia into the interior of the island until 1731	(26). p230	Census= 260 only town residents, no children, no marginalized people, 2000 slaves.	(26). p230	Reports of increasing census, no numbers	(26). p230	Reports of increasing census, no numbers	(26). p230
				(28). p302		(25). p387
				(25). p387
				(78). p293
1599									Census= 6	(78). p294
1606													Census= 10-12, extensive livestock farming	(26). p229
1608													Census= 10	(78). p.294
1613-1639	Admixed individuals own and/or manage commercial firms	(27). p515
1620	Portuguese crown sends boats of women for the peopling of the colony	(26). p11
1623																	Census= 19	(78). p294
1628													Census= 50	(78). p294
1639																	Census= 0	(78). p294
1650	Census= 13980	(78). p297	Census= 9500	(78). p294	Census= 2500	(78). p294	Census= 1000	(78). p294	Census= 300	(78). p294	Census= 400	(78). p294	Census= 120	(78). p294	Census= 150	(78). p294	Census= 0	(78). p294	Census= 10	(78). p294
1677									Census= 1000 ?, Permanent clergy	(28). p326-327			Permanent clergy	(28). p326-327	Permanent clergy	(28). p326-327
1680	Weavery exportations reserved to Portuguese citizen only, Cabo Verdean firms go bankrupt	(28). p310			Earthquake and volcano eruption, migration to Brava	(26). p12-14	Census= 500	(78). p294			Migration from Fogo	(26). p12-14					Census= 0	(78). p294
1683									Census= 900	(78). p294					Census= 6	(78). p294
1699													Census= 230	(78). p294
1700											Census=100	(78). p294
1708			400 soldiers sent to repress marooning in the interior regions. Failure of the expedition	(28). p306
1710			Reports of over 600 maroon slaves	(28). p306
1719			Famine	(26). p12-14
1720	Census= 23130	(78). p297	Census= 12000	(78). p294	Census= 5000	(78). p294	Census= 3000	(78). p294	Census= 650	(78). p294	Census= 1200	(78). p294	Census= 250	(78). p294	Census= 1000	(78). p294	Census= 0	(78). p294	Census= 30	(78). p294
1723					Census= 700	(78). p294	Census= 2500	(78). p294	Census= 1350	(78). p294	Census= 200	(78). p294	Census= 200	(78). p294			Census= 0	(78). p294	Census= 0	(78). p294
1727							Census= 4000, including 502 slaves	(28). p295
1730			Census= 25000	(78). p294	Census= 13000	(78). p294
1731			Census= 17464, ~1800 RibeiraGrande/Praia + ~15664 interior, 16,28% slaves on the whole island	(28). p300-302	No census, 25% slaves and highest "white" people proportion among islands	(28). p300	No census, 15% slaves ~1600 individuals	(28). p296	Census= 360 housholds ~2600 individuals (7/household), 11% slaves	(28). p296	No census, 6% slaves	(28). p296	Census= less than 400	(28). p299	Census= Less than 2% of the total population of Cabo Verde	(28). p299
								(78). p294
1750-1780	Third migration wave into all remaining islands: commercial-monopoly shifts on all trades dictate population settlements and movements among Cabo Verde islands. End of the agro-slavery system in Cabo Verde ((28). p304 )
1770	Census= 26000	(26). p11
1772							Census= 11000	(78). p294
1773					Census= 5900	(26). p12-14
1774	Census= 50639	(28). p355	Census= 24358	(28). p355	Census= 5728	(28). p355	Census= 10215	(28). p355	Census= 5000	(28). p355	Census= 3190	(28). p355	Census= 708	(28). p355	Census= 1440	(28). p355	Census= 0	(28). p355	Census= 0	(28). p355
																		(78). p294		(78). p294
1773-1775	Famine kills 22666 individuals. People sell themsleves into slavery to avoid death	(26). p12-14
		(28). p200
1775	Census= 28368	(28). p355	Census= 11580	(28). p355	Census= 4225	(26). p12-14	Census= 5668	(28). p355	Census= 2920	(28). p355	Census= 2115	(28). p355	Census= 604	(28). p355	Census= 1256	(28). p355	Census= 0	(28). p355	Census= 0	(28). p355
						(28). p355												(78). p294		(78). p294
1788																	Census= 0	(78). p294	Census= 0	(78). p294
1790	Famine	(26). p12-14
1793																			Census= 0	(78). p294
1794																	Census= 100, first settlers	(78). p294
1800	Census= 56050	(78). p294	Census= 26000	(78). p294	Census= 8000	(78). p294	Census= 12000	(78). p294	Census= 4000	(78). p294	Census= 3000	(78). p294	Census= 700	(78). p294	Census= 2200	(78). p294	Census= 100	(78). p294	Census= 50	(78). p294
1803									Census= 4500	(78). p294
1807	Census= 58401	(78). p294	Census= 14200	(78). p294	Census= 13150	(78). p294	Census= 13650	(78). p294	Census= 8300	(78). p294	Census= 6950	(78). p294	Census= 451	(78). p294	Census= 1500	(78). p294	Census= 200	(78). p294	Census= 0	(78). p294
1814															Famine -> Migration from Boa Vista to Fogo and São Nicolau	(26). p12-14
1819																	Census= 120	(78). p294
1820																	Census= 300	(78). p294
1827	Census= 74307	(78). p297	Census= 2505 slaves	(25). p387	Census= 1212 slaves	(25). p387	Census= 207 slaves	(25). p387	Census= 171 slaves	(25). p387	Census= 213 slaves	(25). p387	Census= 240 slaves	(25). p387	Census= 489 slaves	(25). p387	Census= 14 slaves	(25). p387	Census= 72 slaves	(25). p387
1831	Census= 88368	(78). p294	Census= 26220	(78). p294	Census= 17000	(26). p12-14	Census= 21670	(78). p294	Census= 8530	(78). p294	Census= 9320	(78). p294	Census= 1648	(78). p294	Census= 3860	(78). p294	Census= 250	(78). p294	Census= 0	(78). p294
						(78). p294
1832	Census= 60000	(78). p294
1831-1833	Famine kills 30000	(26). p12-14			Famine kills 17000	(26). p12-14	Famine kills 13000	(26). p12-14
1831	End of the AST in the Portuguese Empire with the official abolition of the AST in Brazil, progressive termination of the AST since the 1815 and AST-abolition in the British Empire ((91).)
1834	Census= 55833	(78). p297	Census= 21696	(78). p294	Census= 5615	(26). p12-14	Census= 13587	(78). p294	Census= 5418	(78). p294	Census= 3990	(78). p294	Census= 1905	(78). p294	Census= 3331	(78). p294	Census= 341	(78). p294	Census= 0	(78). p294
						(78). p294
1841	Census= 63000	(78). p294	Census= 19000	(78). p294	Census= 12000	(78). p294	Census= 15000	(78). p294	Census= 7000	(78). p294	Census= 4000	(78). p294	Census= 2000	(78). p294	Census= 3000	(78). p294	Census= 350	(78). p294	Census= 500	(78). p294
1844	Census= 69700	(78). p297	Census= 25000	(78). p294	Census= 7000	(78). p294	Census= 17500	(78). p294	Census= 7200	(78). p294	Census= 4600	(78). p294	Census= 2200	(78). p294	Census= 5200	(78). p294	Census= 400	(78). p294	Census= 600	(78). p294
1848																	Census= 553	(78). p294
1850	Census= 86700	(78). p295
1851	Census= 101700	(78). p295	Census= 27800	(78). p295	Census= 7500	(78). p295	Census= 30200	(78). p295	Census= 20200	(78). p295	Census= 4300	(78). p295	Census= 4100	(78). p295	Census= 4500	(78). p295	Census= 2100	(78). p295	Census= 1000	(78). p295
1854-1855					Cholera kills 800	(26). p12-14
1855	Census= 120000	(78). p295							Census= 11000	(78). p295					Census= 4000	(78). p295
1856-1878	Abolition of Slavery in the Portuguese Empire
1856							Census= 16907	(78). p295
1857	Census= 100000	(78). p295															Census= 1400	(78). p295
1858	Census= 85393	(78). p295
1860	Census= 90000	(26). p12-14
1861	Census= 89310	(78). p297	Census= 40852	(78). p295	Census= 14341	(78). p295	Census= 14643	(78). p295	Census= 6372	(78). p295	Census= 6557	(78). p295	Census= 1863	(78). p295	Census= 2647	(78). p295	Census= 1141	(78). p295	Census= 894	(78). p295
1862	Census= 97009	(78). p295	Census= 44200	(78). p295	Census= 14426	(26). p12-14	Census= 17965	(78). p295	Census= 6731	(78). p295	Census= 6824	(78). p295	Census= 2067	(78). p295	Census= 2621	(78). p295	Census= 1337	(78). p295	Census= 838	(78). p295
						(78). p295
1864	Census= 97009	(78). p297
1863-1866	Famine kills 29845	(26). p12-14	Famine kills 18000	(26). p12-14	Famine forces 7000 individuals into emigration, unknown destinations	(26). p12-14											Census increase by 353 individuals	(26). p12-14
1867	Census= 67517	(78). p297	Census= 26428	(78). p295	Census= 7431	(26). p12-14	Census= 17403	(78). p295	Census= 5522	(78). p295	Census= 5874	(78). p295	Census= 955	(78). p295	Census= 1400	(78). p295	Census= 1690	(78). p295	Census= 814	(78). p295
						(78). p295
1870	Census= 76003	(26). p12-14
		(78). p295
1871	Census= 76053	(78). p297
1872					Census= 10000	(78). p295					Census= 8673	(78). p295					Census= 2000	(78). p295
1874	Census= 90710	(78). p297
1878	Census= 99311	(78). p297	Census= 41077	(78). p295	Census= 12221	(78). p295	Census= 20507	(78). p295	Census= 8733	(78). p295	Census= 8151	(78). p295	Census= 1600	(78). p295	Census= 2643	(78). p295	Census= 3297	(78). p295	Census= 1082	(78). p295
1882	Census= 103761	(78). p295
1885	Census= 115461	(78). p297	Census= 45488	(78). p295	Census= 16000	(78). p295	Census= 22000	(78). p295	Census= 11000	(78). p295	Census= 9013	(78). p295	Census= 1000	(78). p295	Census= 4000	(78). p295	Census= 6560	(78). p295	Census= 400	(78). p295
1888	Census= 121127	(78). p295
1890	Census= 127390	(26). p12-14
		(78). p297
1898	Census= 142537	(78). p295
1899-1900					Famine and smallpox	(26). p12-14			Famine and smallpox	(26). p12-14
1900	Census= 147424	(26). p12-14
		(78). p297
1901-1902	Famine	(26). p12-14			Great poverty	(26). p12-14	Great poverty	(26). p12-14	Diseases and fevers	(26). p12-14	Diseases and fevers	(26). p12-14	Great population reduction, no census	(26). p12-14
1903-1904			Famine kills 15000	(26). p12-14
1905	Census= 135000	(26). p12-14
1910	Census= 142252	(26). p12-14											Census=
		(78). p295
1913	Census= 147754	(78). p295	Census= 59222	(78). p295	Census= 17800	(78). p295	Census= 33724	(78). p295	Census= 12041	(78). p295	Census= 9207	(78). p295	Census= 1867	(78). p295	Census= 2823	(78). p295	Census= 10491	(78). p295	Census= 579	(78). p295
1920	Census= 160000	(26). p12-14
1930	Census= 146299	(26). p15
1940	Census= 181740	(26). p16	Census= 77382	(26). p16	Census= 23022	(26). p16	Census= 35977	(26). p16	Census= 14846	(26). p16	Census= 8528	(26). p16	Census= 2237	(26). p16	Census= 2779	(26). p16	Census= 15848	(26). p16	Census= 1121	(26). p16
1942					Census= 25000	(26). p12-14
1941-1943	Famine	(26). p12-14			Famine kills 7500 (31%)	(26). p12-14			Famine kills 28%, no census	(26). p12-14
1944					Census= 17500	(26). p12-14
1946-1948	Great famine kills 65% of the total population	(26). p12-14
1950	Census= 149989-148331	(26). p16	Census= 59384	(26). p16	Census= 17582	(26). p16	Census= 28379	(26). p16	Census= 10366	(26). p16	Census= 7937	(26). p16	Census= 1942-1044	(26). p16	Census= 2985	(26). p16	Census= 19576	(26). p16	Census= 1838	(26). p16
		(78). p295												(78). p297
1960	Census= 199902	(26). p16	Census= 88587	(26). p16	Census= 25615	(26). p16	Census= 33953	(26). p16	Census= 13866	(26). p16	Census= 8625	(26). p16	Census= 2680	(26). p16	Census= 3263	(26). p16	Census= 20705	(26). p16	Census= 2608	(26). p16
1970	Census= 270999-272071	(26). p16	Census= 128782-129358	(26). p16	Census= 29412	(26). p16	Census= 44623	(26). p16	Census= 16308	(26). p16	Census= 7756	(26). p16	Census= 3466	(26). p16	Census= 3569	(26). p16	Census= 31578	(26). p16	Census= 5505	(26). p16
		(78). p295		(78). p295
1975	Independence of Cabo Verde
1980	Census= 295703-320000	(26). p16	Census= 145957	(26). p16	Census= 30978	(26). p16	Census= 43321	(26). p16	Census= 13572	(26). p16	Census= 6985	(26). p16	Census= 4098	(26). p16	Census= 3372	(26). p16	Census= 41594	(26). p16	Census= 5826	(26). p16
		(78). p295
1980-1985	Emigration -2552/year + Diaspora = 405-420K -> 250K USA ; 83-88K West Europe ; 68-76K continental Africa	(26). p16
2015	Census= 524833	(120). p.36	Census= 294135	(120). p.36	Census= 35837	(120). p.36	Census= 40547	(120). p.36	Census= 12424	(120). p.36	Census= 5698	(120). p.36	Census= 6980	(120). p.36	Census= 14451	(120). p.36	Census= 81014	(120). p.36	Census= 33747	(120). p.36
