# Supplementary material for: A genetic and linguistic analysis of the admixture histories of the islands of Cabo Verde
Source: eLife. 2023 Apr 25;12:e79827. doi: 10.7554/eLife.79827 (PMC10322156; doi:10.7554/eLife.79827)
Supplement: Table 1—source data 1. [file elife-79827-table1-data1.xlsx]

## Sheet: Table1-resource_table_1
Table 1-source data 1:
Mantel correlations among individual birth-places, residence-places, maternal and paternal birth places, age, and academic education duration.
We considered only the 225 genetically unrelated Cabo Verde-born individuals in these analyses.
Target	Mantel variable	n	Geographic scale	Spearman rho	10000 Mantel two-sided permutation p
abs(Age difference)	log(Birth-loc dist.)	225	within and between islands	0.0046	0.3524
abs(Education duration difference)	log(Birth-loc dist.)	186	within and between islands	0.0553	0.0007
abs(Education duration difference)	log(Residence dist.)	185	within and between islands	0.0809	< 2.10-4
log(Residence dist.)	log(Birth-loc dist.)	224	within and between islands	0.6910	< 2.10-4
log(Father Birth-loc dist.)	log(Birth-loc dist.)	222	within and between islands	0.5967	< 2.10-4
log(Mother Birth-loc dist.)	log(Birth-loc dist.)	224	within and between islands	0.7326	< 2.10-4
abs(Age difference)	log(Birth-loc dist.)	225	within islands only	0.1737	0.0047
abs(Education duration difference)	log(Birth-loc dist.)	186	within islands only	0.0889	0.1310
abs(Education duration difference)	log(Residence dist.)	185	within islands only	0.1632	0.0147
log(Residence dist.)	log(Birth-loc dist.)	224	within islands only	-0.0439	0.2752
log(Father Birth-loc dist.)	log(Birth-loc dist.)	222	within islands only	0.1865	0.0095
log(Mother Birth-loc dist.)	log(Birth-loc dist.)	224	within islands only	0.2356	0.0005
